# Supplementary material for: Distinct RanBP1 nuclear export and cargo dissociation mechanisms between fungi and animals
Source: eLife. 2019 Apr 25;8:e41331. doi: 10.7554/eLife.41331 (PMC6524963; doi:10.7554/eLife.41331)
Supplement: Figure 3—source data 1. [file elife-41331-fig3-data1.xlsx]

## Sheet: Figure 3B source data
Time	0	15	45	75
background substracted readings, each time point is repeated four times	-0.00175	0.00125	0.00325	0.01325	yCRM1-PKI-yRan
	-0.00175	0.00825	0.00425	0.00625
	-0.00275	0.00325	0.00625	0.00725
	0.00625	0.00725	0.00525	0.00625
	-0.00225	0.00075	Outlier	0.00875	hCRM1-PKI-yRan
	-0.00025	-0.00125	-0.00025	0.00175
	0.00675	0.00275	0.00175	-0.00125
	-0.00425	0.00175	0.00175	0.00375
	0.00425	0.05825	0.14425	0.19525	yRan+yRanBP1
	-0.00175	0.06025	0.14825	0.21125
	-0.00175	0.05825	0.14325	0.19925
	-0.00075	0.05825	0.14525	0.20525
	0.00325	0.04925	0.10425	0.15825	yRan+yRanBP1+yCRM1
	-0.00275	0.03825	0.10625	0.16325
	0.00125	0.03525	0.10325	0.16225
	-0.00175	0.05225	0.11525	0.14825
	-0.001	0.09	0.204	0.239	hRan+hRanBP1
	0.005	0.096	0.208	0.247
	-0.002	0.096	0.206	0.245
	-0.002	0.098	0.196	0.266
	0.0015	0.0905	0.1845	0.2505	hRan+hRanBP1+hCRM1
	-0.0025	0.0945	0.2015	0.2415
	0.0005	0.0905	0.1975	0.2635
	0.0005	0.0955	0.2025	0.2505
