# Supplementary material for: Distinct RanBP1 nuclear export and cargo dissociation mechanisms between fungi and animals
Source: eLife journal article supplement (doi:10.7554/elife.41331), 2019-04-25
Supplement: supp [file elife_poa_e41331_Figure_1_figure_supplement_1.pdf › elife_poa_e41331_Figure_1_figure_supplement_1.pdf]

|                                    |            |
|------------------------------------|------------|
| Mammals_Homo_sapiens               | VAEKLEALSV |
| Mammals_Camelus_dromedarius        | VAEKLDALTV |
| Birds_Zonotrichia_albicollis       | VAEKLEELSV |
| Birds_Merops_nubicus               | VAEKLGELSV |
| Reptiles_Pogona_vitticeps          | VAEKLEELSV |
| Reptiles_Anolis_carolinensis       | VAKKLEELSV |
| Amphibians_Xenopus_laevis          | VAEKLEELSV |
| Amphibians_Xenopus_tropicalis      | VAEKLEELSV |
| Fish_Rhincodon_typus               | VAEKLEELSV |
| Fish_Callorhinchus_milii           | VAEQLEELSV |
| Echinoderms_Acanthaster_planci     | IAEKLGEMTV |
| Echinoderms_Apostichopus_japonicus | VTEKLEELTV |
| Molluscs_Mizuhopecten_yessoensis   | VAEKLGELSV |
| Molluscs_Aplysia_californica       | LSGQLKDLKV |
| Arthropods_Lepeophtheirus_salmonis | VAEKLEELSV |
| Arthropods_Ooceraea_biroi          | ILIEILKLKV |
| Cnidaria_Exaiptasia_pallida        | LAKELEGLNV |
| Cnidaria_Stylophora_pistillata     | LAQELEGLNV |
| Coelenterata_Exaiptasia_pallida    | LAKELEGLNV |
| Coelenterata_Thelohanellus_kitaei  | LEKSLKEVKI |
| Porifera_Amphimedon_queenslandica  | LTSDLEKLDV |
| Fungi_Zancudomyces_culisetae       | ESKKEDDASE |
| Fungi_Bifiguratus_adelaidae        | EDKKEDEEDE |
