# Supplementary material for: Distinct RanBP1 nuclear export and cargo dissociation mechanisms between fungi and animals
Source: eLife journal article supplement (doi:10.7554/elife.41331), 2019-04-25

[UV 1 280 Chrom.1:s200i for Y-COM-20170811 001](#)  
[UV 2 254 Chrom.1:s200i for Y-COM-20170811 001](#)  
[Fraction Chrom.1:s200i for Y-COM-20170811 001](#)

yRanBP1 complex

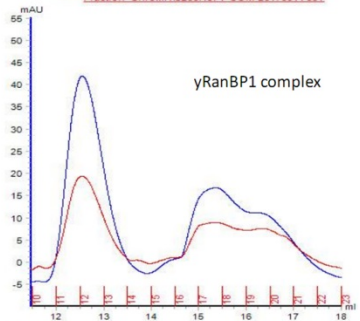

0 11 12 13 14 15 16 17 18 Ran yRanBP1 yCRM1

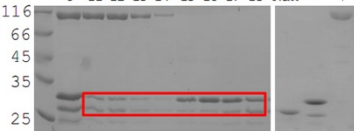

[UV 1 280 Chrom.1:s200i for h-com-20170725 001](#)  
[UV 2 254 Chrom.1:s200i for h-com-20170725 001](#)  
[Fraction Chrom.1:s200i for h-com-20170725 001](#)

mRanBP1 complex

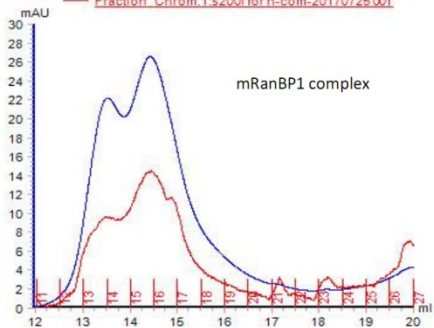

0 11 12 13 14 15 16 17 18 Ran mRanBP1 hCRM1

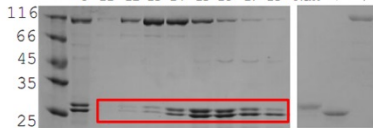

Supplement: supp [file elife_poa_e41331_Figure_1_figure_supplement_2.pdf › elife_poa_e41331_Figure_1_figure_supplement_2.pdf]
