# Supplementary material for: Distinct RanBP1 nuclear export and cargo dissociation mechanisms between fungi and animals
Source: eLife journal article supplement (doi:10.7554/elife.41331), 2019-04-25
Supplement: supp [file elife_poa_e41331_Figure_1_figure_supplement_4.pdf › elife_poa_e41331_Figure_1_figure_supplement_4.pdf]

**RanBP1 (human)**

```

RanBP1 (human)      1  .....MAAAKDTHEDHDTSTENTDENSHD P Q
RanBP1 (mouse)      1  .....MAAAKDSHEDHDTSTENADESNH D P Q
RanBP1 (zebrafish)  1  .....MADTKEAQDEHPESTENVEESNH D P H
RanBP1 (frog)       1  .....MADTKDTQEEHETSVNDTEESNH D P Q
RanBP1 (yeast)      1  MSSEDDKKPVVDKKEEAAPKPPSSAVFSMFGGKKAEEKPETKKDEEDTKEETK. EGDDAPESE D I H
RanBP2_RBD1 (human) 1  .....LFSSQYGKMANKANTSGD.....FEKDDDAYKTEDSD D I H
RanBP2_RBD2 (human) 1  .....EESDVTQEEERD G Q Y
RanBP2_RBD3 (human) 1  ..... d. I H
consensus>70

```

**RanBP1 (human)**

TT      β1      TT      β2      β3

```

RanBP1 (human)      27  FEP!VSLPEQ.EIKTLEEEELFKMRRAKLFRRFASENDLPEWKERGTCDVKLKHKEKGAIRLLM
RanBP1 (mouse)      27  FEP!VSLPEQ.EIKTLEEEELFKMRRAKLFRRFASENDLPEWKERGTCDVKLKHKEKGTIRLLM
RanBP1 (zebrafish)  27  FEP!VSLPEQ.DVKTLEEEELFKMRRAKLFRRFASENDPPEWKERGTCDVKLKHKEKGSIRLLM
RanBP1 (frog)       27  FEP!VSLPEQ.EIKTLEEEELFKMRRAKLFRRFASENDPPEWKERGTCDVKLKHKEKGTIRLLM
RanBP1 (yeast)      65  FEPVHLE.KVDVKTMEEDEEVLVKVRAKLFRRDAD..AKEWKERGTCDCKLKNKKTNNKIRLLM
RanBP2_RBD1 (human) 65  FEPVLPDKIEVKTGEDEEEFFCNRAKLFRRDVE..SKEWKERGTGNVKKLRHKTSGKIRLLM
RanBP2_RBD2 (human) 36  FEPVVPMEKFLVLTGEEDEEKVLYSQRVQLFRDAD..VSQWKERGTGNLKLHNGVNGKIRLLM
RanBP2_RBD3 (human) 16  FEPVVPFLDLVEVSSGEENEQVVFSHRAKLYRRDKD..VGQWKERGTGDIKLLQNYDNKQIRIVM
RanBP2_RBD4 (human) 4   FEP!VSLPE.VEVKSGEEDEELFKERAKLYRRDRD..VSQWKERGVGDIKLLHWTMKNYIRLLM
consensus>70
FEP!V.$pe..#vkt.EE#Ee.l$..RaKl%Rf..#...#WKERG.G#vK.L...iR.lM

```

**RanBP1 (human)**

TTT      β4      β5      β6      TT      β7      α1

```

RanBP1 (human)      91  RRDKTLKKICANHVTTPMME LKPNAGSDRAWVWNTHADFADECPEKPELTAIRFLNAENAKQFKTKF
RanBP1 (mouse)      91  RRDKTLTKICANHVTTPMME LKPNAGSDRAWVWNTHADFADECPEKPELTAIRFLNAENAKQFKTKF
RanBP1 (zebrafish)  91  RRDRTLKKICANHVTTPMME LKPNAGSDRAWVWNTHADFADECPEKPELTAIRFLNAENAKQFKTKF
RanBP1 (frog)       91  RRDKTLKKICANHVTTPMME LKPNAGSDRAWVWNTHADFADECPEKPELTAIRFLNAENAKQFKTKF
RanBP1 (yeast)      127 RRDKTLKKICANHVTTPMME LKPNVGSRSWVYACTADAEAGEAEFTFAIRGSGSKNDKFEKF
RanBP2_RBD1 (human) 65  RREQVLKIKCANHVTTPMMLKPNAGSDRSFVWHA.LVADDELPEQLAIRKTPEDGALFKCKF
RanBP2_RBD2 (human) 99  RREQVLKVCANHVTTPMTNMLKPLSGSDRAWMWLA.SDFSDGAKLEQLAAKFKTPEDAEFKQKF
RanBP2_RBD3 (human) 79  RREQVLKICANHVTTPDMTLQNMMGTERVWLWTA.CDFADGERKKVEHLAVRRKLODVADSKKIF
RanBP2_RBD4 (human) 66  RRQVQFKVCANHVTTKTMELKPLNVSNNALVWTA.SDYADGEAKVEQLAVRRKTKEDVDFKTKF
consensus>70
RR#.lKiCANH.I.p.m.Lkp..gs#r.vvw...Dfa#.k.e.lAirF...#.Aq.FK..F

```

**RanBP1 (human)**

Q Q Q Q Q Q Q Q

```

RanBP1 (human)      156 EECKREIEEREKKAGSGKNDHAEKVAERLEALSVEETKEDAEKEKQ.....
RanBP1 (mouse)      156 EECKREIEEREK.GKPGKNDNAEKVAERLEALSVEAREAREAEKSEKQ.....
RanBP1 (zebrafish)  156 DECKEEVRFK...LEGSMNSANKVAERLEALSVDNDKTKSSDEKKEAEKKEKAVEKK
RanBP1 (frog)       156 EECNEMKRN.KEKDTTRKNDSDAKVAERLEELSVKEAKAQDQKEDAKQDKAEKQ.....
RanBP1 (yeast)      192 EKAAQEIINKA.....
RanBP2_RBD1 (human) 129 EEAQSILK.....
RanBP2_RBD2 (human) 163 EECQRL.....
RanBP2_RBD3 (human) 143 DEAKTAQEK.....
RanBP2_RBD4 (human) 130 EECQQ.....
consensus>70
#e

```
