# Supplementary material for: Distinct RanBP1 nuclear export and cargo dissociation mechanisms between fungi and animals
Source: eLife journal article supplement (doi:10.7554/elife.41331), 2019-04-25

A

hRanBP1<sup>WT</sup>

FEECRKEIEEREKKAGSGKNDHAEKVAEKLALSVKEETKEDAEKQ-

hRanBP1<sup>Δlinker</sup>-NLS

FEECRKEK-----VEKLAEKLEALSVKEETKEDAEKQKRTADGSEFESPKKKRKV-

hRanBP1<sup>ΔNES</sup>-NLS

FEECRKEIEEREKKAGSGKNDHAEKVAEKEE-----TKEDAEKQKRTADGSEFESPKKKRKV-

B

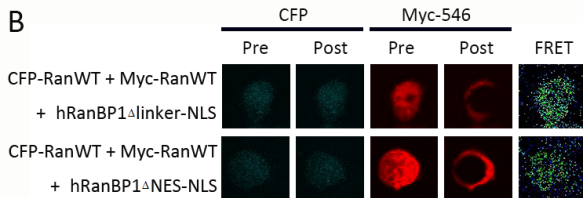

C

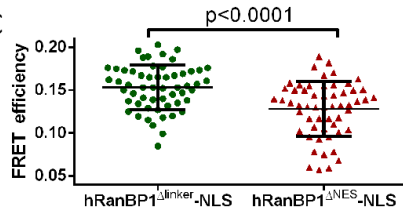

Supplement: supp [file elife_poa_e41331_Figure_5_figure_supplement_2.pdf › elife_poa_e41331_Figure_5_figure_supplement_2.pdf]
