# Supplementary material for: Distinct RanBP1 nuclear export and cargo dissociation mechanisms between fungi and animals
Source: eLife journal article supplement (doi:10.7554/elife.41331), 2019-04-25
Supplement: supp [file elife_poa_e41331_Figure_5_figure_supplement_3.pdf › elife_poa_e41331_Figure_5_figure_supplement_3.pdf]

Hoechst

HA(Cy3)

Myc(Cy5)

Merge

Myc-Ran<sup>WT</sup>-CYFP  
+NYFP-Ran<sup>WT</sup>-HA

Myc-Ran<sup>Cmut</sup>-CYFP  
+NYFP-Ran<sup>Cmut</sup>-HA
