# Supplementary material for: Distinct RanBP1 nuclear export and cargo dissociation mechanisms between fungi and animals
Source: eLife journal article supplement (doi:10.7554/elife.41331), 2019-04-25
Supplement: supp [file elife_poa_e41331_Figure_6_figure_supplement_1.pdf › elife_poa_e41331_Figure_6_figure_supplement_1.pdf]

|                          |     | 110       | 120       | 130        | 140         | 150           | 160                          |
|--------------------------|-----|-----------|-----------|------------|-------------|---------------|------------------------------|
| Saccharomyces_cerevisiae | 103 | WKERGTGDC | FKLNKKT   | NKVRI      | LMRRDKTLKI  | CANHI         | IAPEYTLKPNVGSDRSWVYACTA      |
| Kluyveromyces_marxianus  | 104 | WKERGTGDV | FKLQHKET  | KKVRL      | LMRRDKTLKV  | CANHI         | IAPEYVTLKPNVGSDRSWVYACTA     |
| Cyberlindnera_fabianii   | 115 | WKERGTGDV | FKLKHKET  | KKVRL      | LMRRDKTLKI  | CANHF         | IHPDYVTLKPNVGSDRSWVYAVTA     |
| Candida_orthopsilosis    | 120 | WKERGTGDV | FKLKHKAT  | GKTRI      | LMRRDKTLKI  | CANHL         | IQSDYELKPNIGSDRSWVYTVTA      |
| Hanseniaspora_opuntiae   | 94  | WKEKGTGDC | IKLVHKES  | GKARI      | LMRRDKTLKI  | CANHY         | VNPTYELKENIGSDRSWLNVIG       |
| Blastomyces_gilchristii  | 160 | WKERGTGDV | RLKHKEN   | HKTRL      | VMRRDKTLKV  | CANHY         | IVPDMKLPNVGSDRSWVWNAATA      |
| Aspergillus_bombycis     | 144 | WKERGTGDV | RLKHKEN   | QKTRL      | VMRRDKTLKV  | CANHY         | IVPAMKLPNVGSDRSWVWNAATA      |
| Talaromyces_islandicus   | 139 | WKERGTGDV | RLKHKEN   | QKTRL      | VMRRDKTLKV  | CANHY         | IVPDMKLPNVGSDRSWVWNAATA      |
| Cryptococcus_gattii      | 57  | WKERGTGDV | RLKHKET   | GKVR       | LMRRDKTLKV  | CANHI         | LSPDMKLPNVGSDRSWVYNVATA      |
| Malassezia_pachydermatis | 66  | WKERGTGDV | RLKHKET   | KKVRL      | VMRRDKTLKV  | CANHF         | VSPDIKLQPNVGSDRSWVYNVATA     |
| Endocarpon_pusillum      | 161 | WKERGTGDV | RLKHKEN   | QKTRL      | VMRRDKTLKV  | CANHY         | VTPEMKLPNVGSDRSWVWNVSA       |
| Madurella_mycetomatis    | 135 | WKERGTGDV | RLKHRET   | GKTRL      | VMRRDKTLKV  | CANHY         | VTPEMKLPNVGSDRSWVWNAATA      |
| consensus>70             |     | WKErGTGDv | . . Lkhke | . . K . Rl | . MRRDKTLK! | CANH . i . pd | . . L . pN!GSDRSWv . . . . a |
