# Supplementary material for: Distinct RanBP1 nuclear export and cargo dissociation mechanisms between fungi and animals
Source: eLife journal article supplement (doi:10.7554/elife.41331), 2019-04-25
Supplement: supp [file elife_poa_e41331_Figure_6_figure_supplement_4.pdf › elife_poa_e41331_Figure_6_figure_supplement_4.pdf]

yCRM1 1 .....MEGLTDFSNLDIALLDQVVSIFYQGSQVQQRQAEELTRFQDNPDAWQKADQILOFS  
 hCRM1 1 MPAAIMTMLADHAAARQELDFSQKLDINLLDNVNVNCLYHGEGAQQRMAQEVLTHTLKEHPDAWTRVDITILFS

yCRM1 59 .....  
 hCRM1 71 .....

yCRM1 129 .....  
 hCRM1 141 .....

yCRM1 199 .....  
 hCRM1 211 .....

yCRM1 269 .....  
 hCRM1 281 .....

yCRM1 339 .....  
 hCRM1 346 .....

yCRM1 409 .....  
 hCRM1 398 .....

yCRM1 479 .....  
 hCRM1 468 .....

yCRM1 549 .....  
 hCRM1 538 .....

yCRM1 619 .....  
 hCRM1 608 .....

yCRM1 689 .....  
 hCRM1 678 .....

yCRM1 759 .....  
 hCRM1 748 .....

yCRM1 829 .....  
 hCRM1 818 .....

yCRM1 899 .....  
 hCRM1 888 .....

yCRM1 969 .....  
 hCRM1 956 .....

yCRM1 1039 .....  
 hCRM1 1022 .....
