# Supplementary figures and images for: Distinct RanBP1 nuclear export and cargo dissociation mechanisms between fungi and animals
Source: eLife journal article supplement (doi:10.7554/elife.41331), 2019-04-25

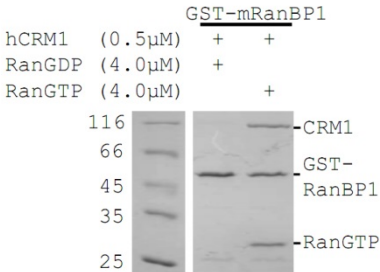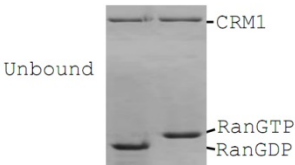

Supplement: supp [file elife_poa_e41331_Figure_1_figure_supplement_3.pdf › elife_poa_e41331_Figure_1_figure_supplement_3.pdf]

# GST-NES<sup>PKI</sup>

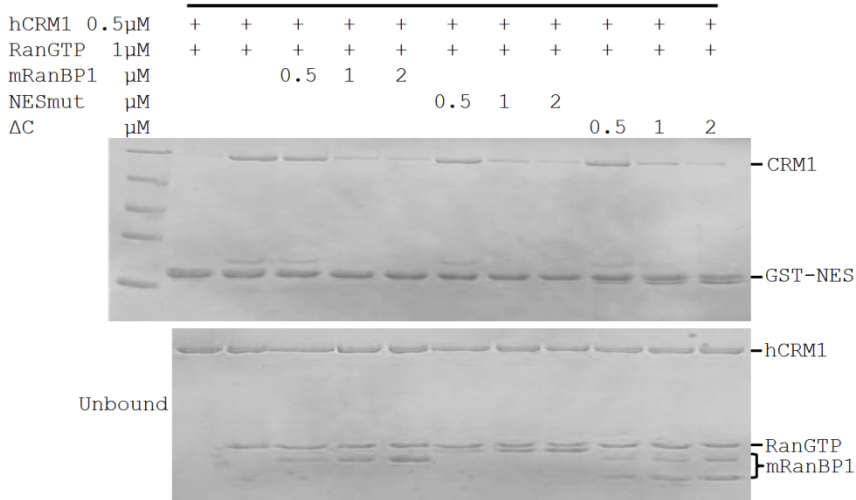

Supplement: supp [file elife_poa_e41331_Figure_2_figure_supplement_1.pdf › elife_poa_e41331_Figure_2_figure_supplement_1.pdf]

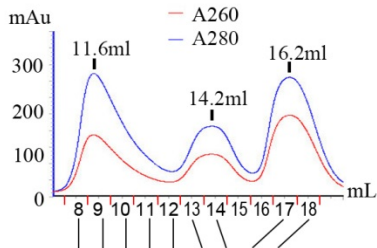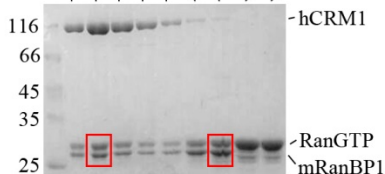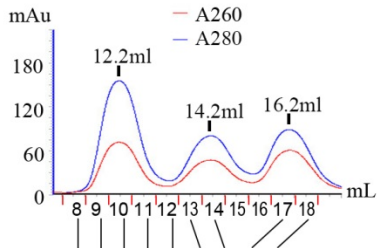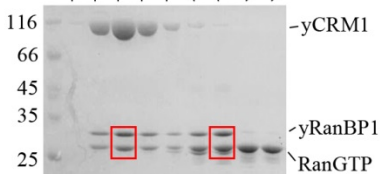

Calculated Ran:RanBP1 molar ratio in the first peak, assuming 1:1 binding in the second peak:

1.48

0.72

Supplement: supp [file elife_poa_e41331_Figure_4_figure_supplement_1.pdf › elife_poa_e41331_Figure_4_figure_supplement_1.pdf]

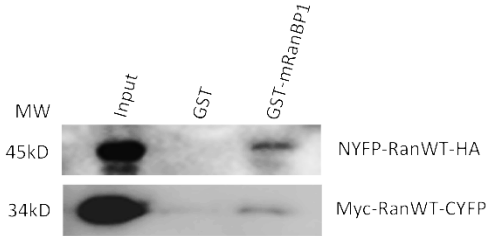

Supplement: supp [file elife_poa_e41331_Figure_5_figure_supplement_1.pdf › elife_poa_e41331_Figure_5_figure_supplement_1.pdf]

A

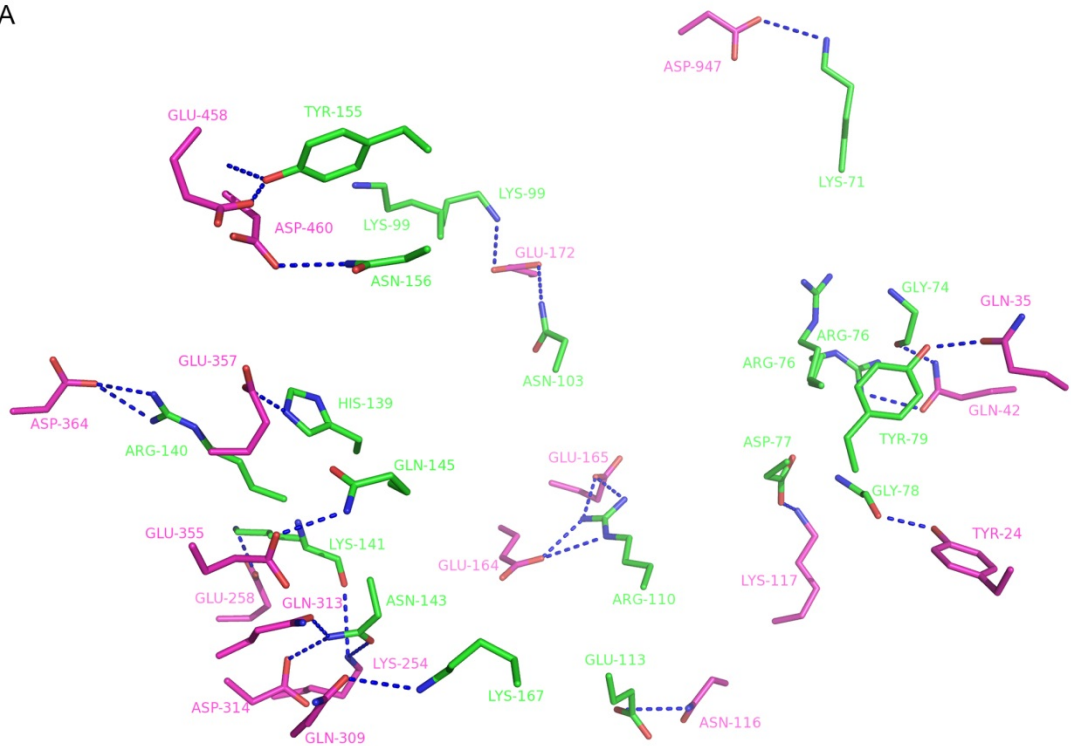

B

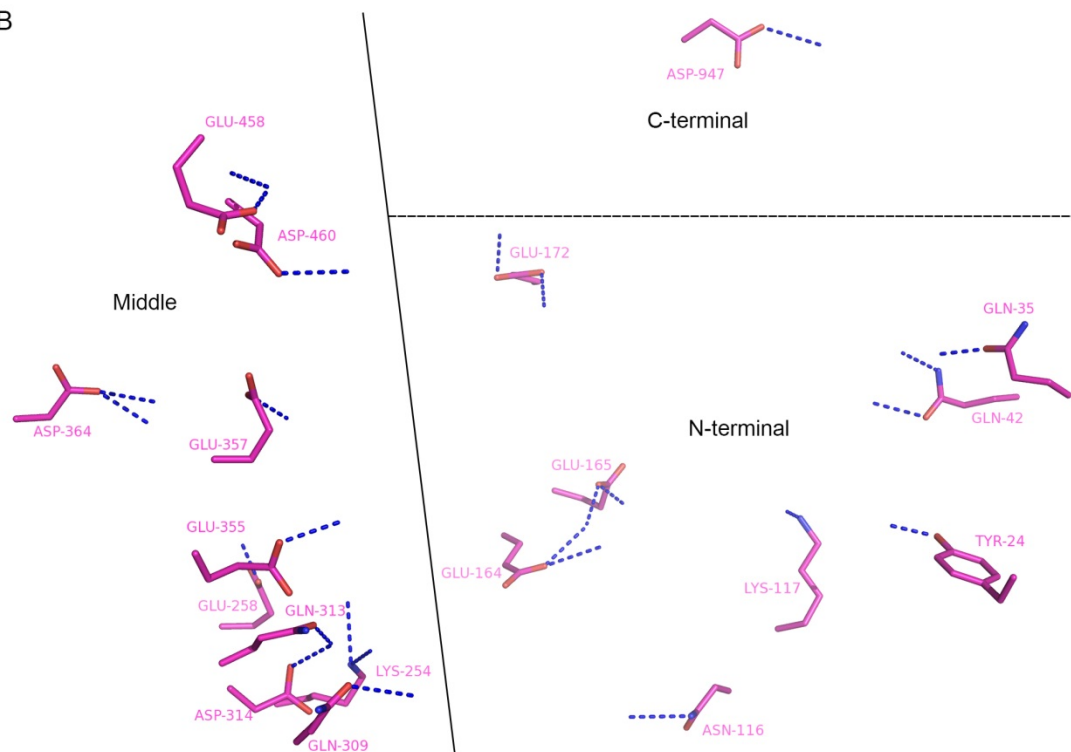

Supplement: supp [file elife_poa_e41331_Figure_6_figure_supplement_2.pdf › elife_poa_e41331_Figure_6_figure_supplement_2.pdf]

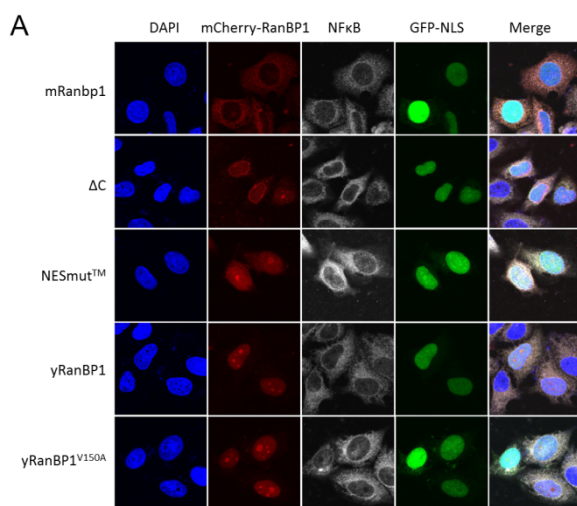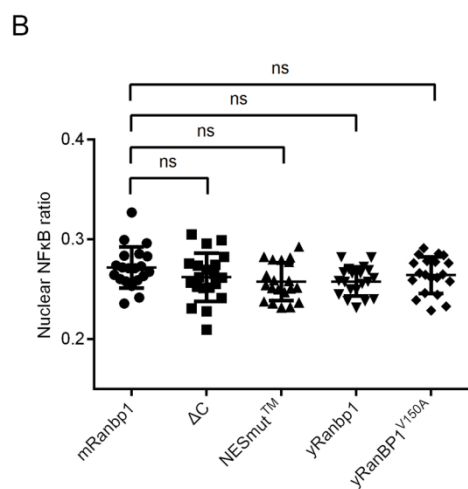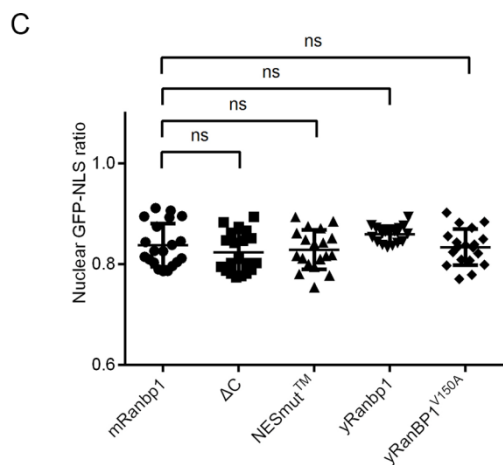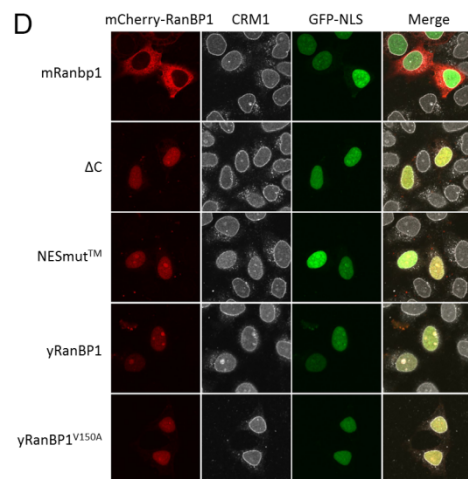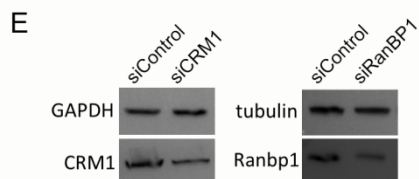

Supplement: supp [file elife_poa_e41331_Figure_7_figure_supplement_1.pdf › elife_poa_e41331_Figure_7_figure_supplement_1.pdf]
